# Supplementary material for: Construction of a heterojunction with fast charge transport channels for photocatalytic hydrogen evolutionviaa synergistic strategy of Co-doping and crystal plane modulation
Source: Royal Society of Chemistry journal article supplement (doi:10.1039/d3nr00092c), 2023-01-01
Supplement: d3nr00092c1.pdf [file d3nr00092c1.pdf]

## Supporting Information

### **Construction of heterojunction with fast charge transport channel for photocatalytic hydrogen evolution via a synergistic strategy of Co-doping and crystal plane modulation**

Yanyun Wang<sup>a</sup>, Shuang Liang<sup>b</sup>, Changjiang Zuo<sup>a</sup>, Hao Fang<sup>a</sup>, Guomeng Dong<sup>a</sup>,

Xiaoli Sheng<sup>a</sup>, Bo Wu<sup>\*c</sup>, Yiwei Zhang<sup>\*a</sup>, Yuming Zhou<sup>\*a</sup>

*a. School of Chemistry and Chemical Engineering, Southeast University, Jiangsu Optoelectronic Functional Materials and Engineering Laboratory, Nanjing 211189, P. R. China.*

*b. Department of chemistry, Department of chemical engineering and materials science, University of Minnesota 55455-0431, United States.*

*c. Multiscale Computational Materials Facility, Key Laboratory of Eco-Materials Advanced Technology, College of Materials Science and Engineering, Fuzhou University, Fuzhou 350100, China.*

Tel: +86 25 52090617; Fax: +86 25 52090617.

Bo Wu\*. E-mail: wubo@fzu.edu.cn

Yiwei Zhang\*. E-mail: zhangchem@seu.edu.cn

Yuming Zhou\*. E-mail: ymzhou@seu.edu.cn

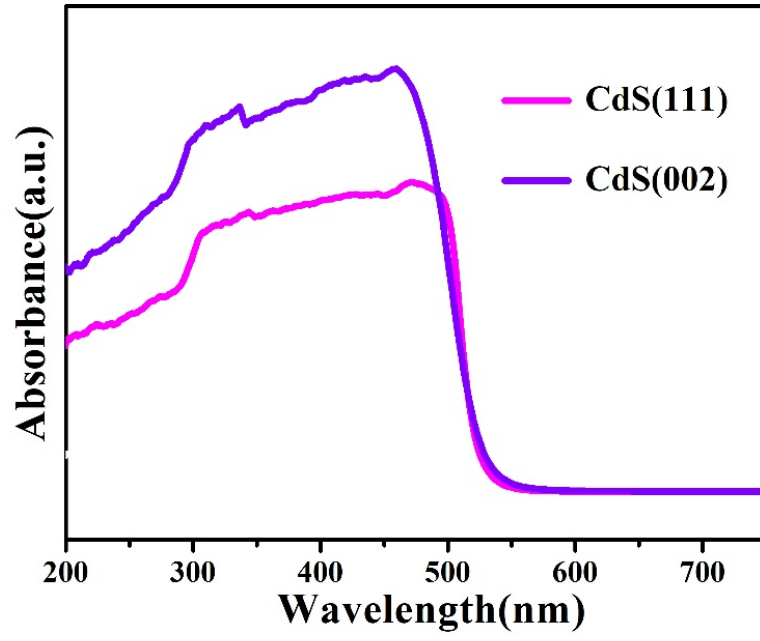

**Fig. S1.** UV-vis spectra of CdS(111) and CdS(002).

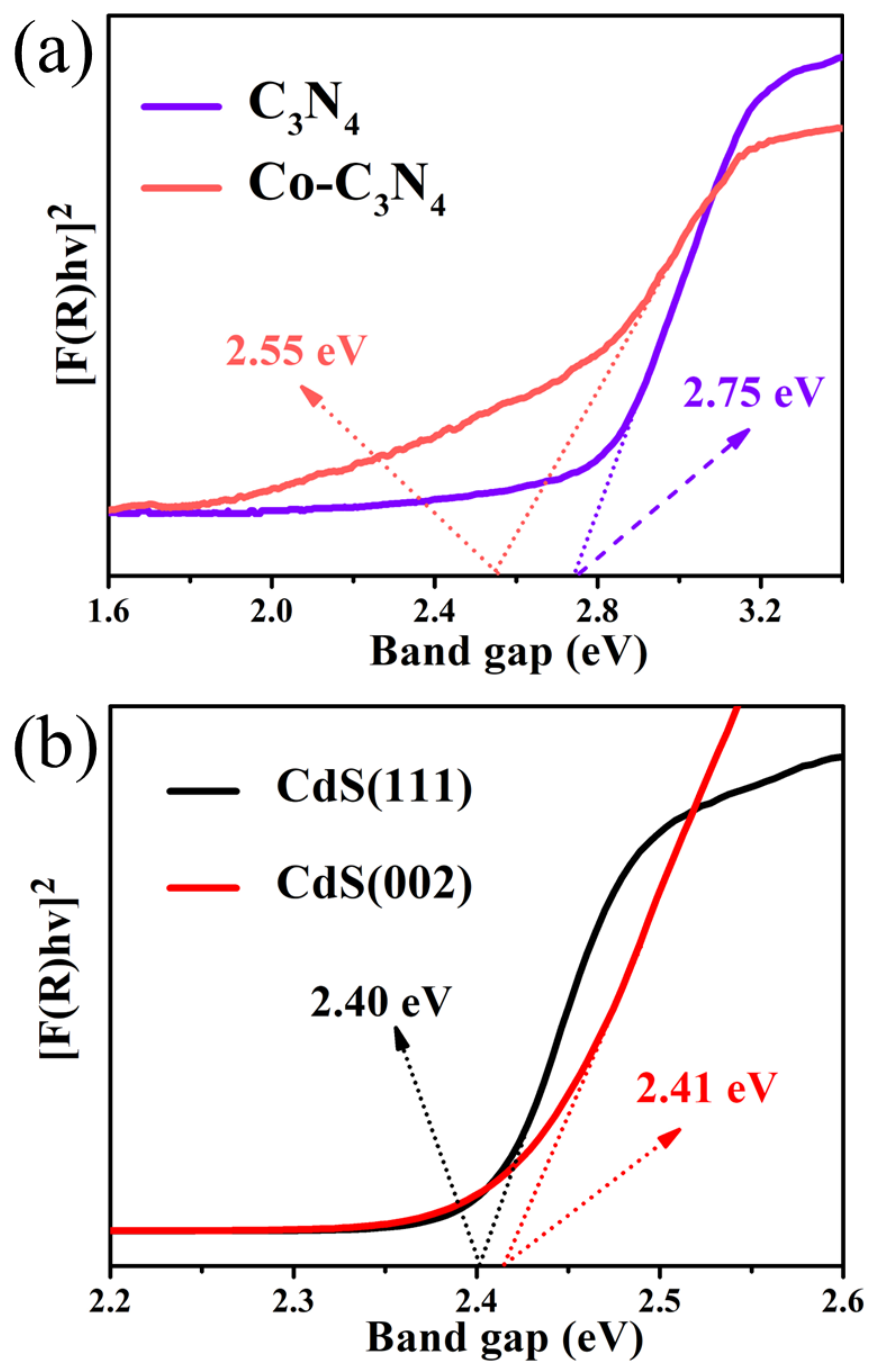

Fig. S2. Calculated Kubelka-Munk plots of (a)  $C_3N_4$ ,  $Co-C_3N_4$ ; (b)  $CdS(111)$ ,  $CdS(002)$ .

**Table S1.** Information for BET specific surface area, pore diameter and pore volume.

| Sample                                    | S <sub>BET</sub> (m <sup>2</sup> g <sup>-1</sup> ) | Pore diameter (nm) | Pore volume (cm <sup>3</sup> g <sup>-1</sup> ) |
|-------------------------------------------|----------------------------------------------------|--------------------|------------------------------------------------|
| C <sub>3</sub> N <sub>4</sub>             | 121                                                | 11.51              | 0.295                                          |
| Co-C <sub>3</sub> N <sub>4</sub>          | 135                                                | 9.09               | 0.321                                          |
| CdS(111)/Co-C <sub>3</sub> N <sub>4</sub> | 113                                                | 10.52              | 0.337                                          |
| CdS(002)/Co-C <sub>3</sub> N <sub>4</sub> | 118                                                | 12.13              | 0.359                                          |

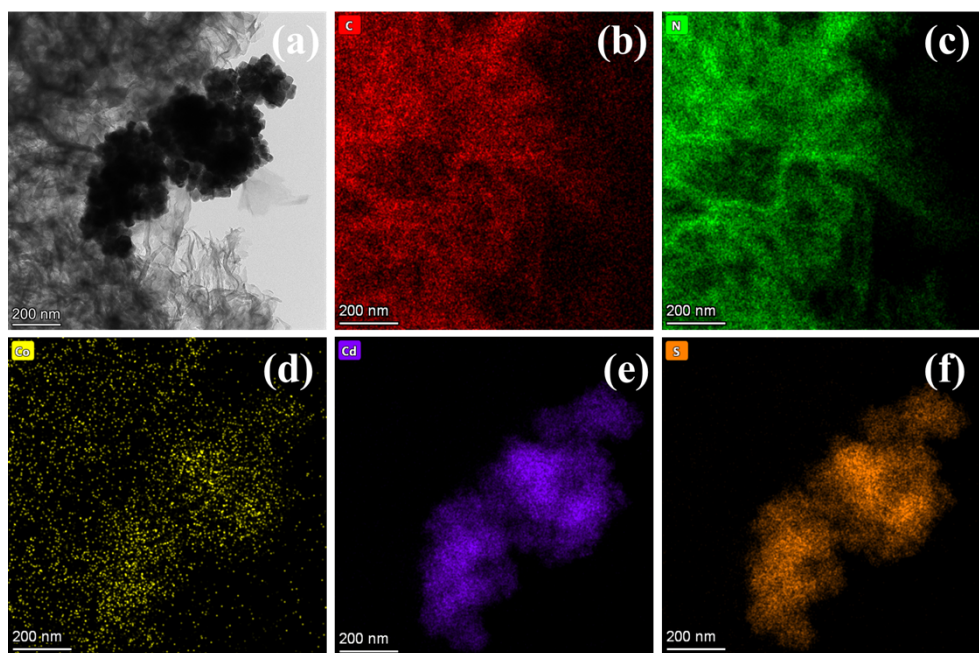

**Fig. S3.** (a) TEM images and (b-f) elemental mapping images of CdS(111)/Co-C<sub>3</sub>N<sub>4</sub>.

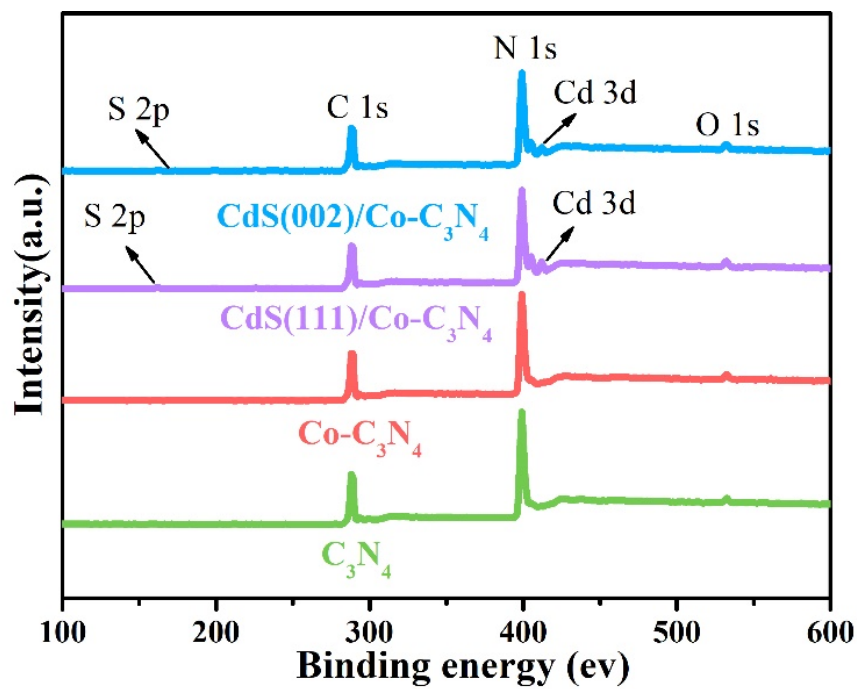

Fig. S4. Full x-ray photoelectron spectra.

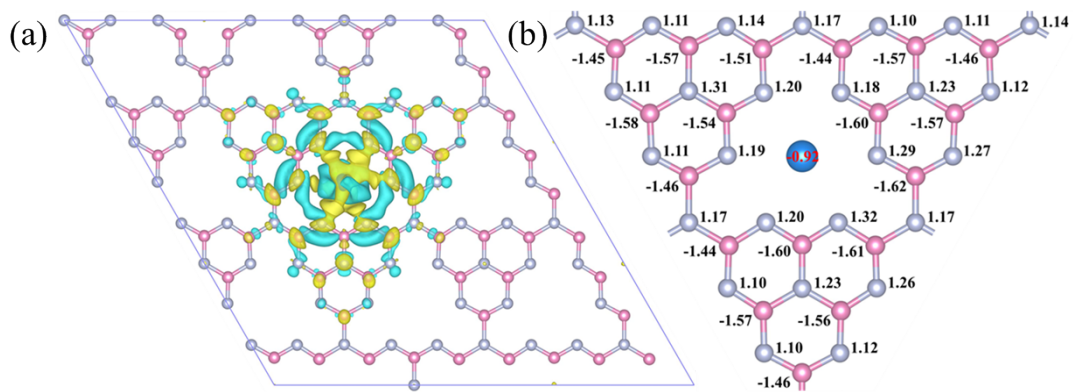

**Fig. S5.** (a) Top view of differential charge density of Co-C<sub>3</sub>N<sub>4</sub>, isosurface is 0.01 e/Å<sup>3</sup>, yellow represents charge accumulation and cyan represents charge depletion; (b)

Bader charge analysis.

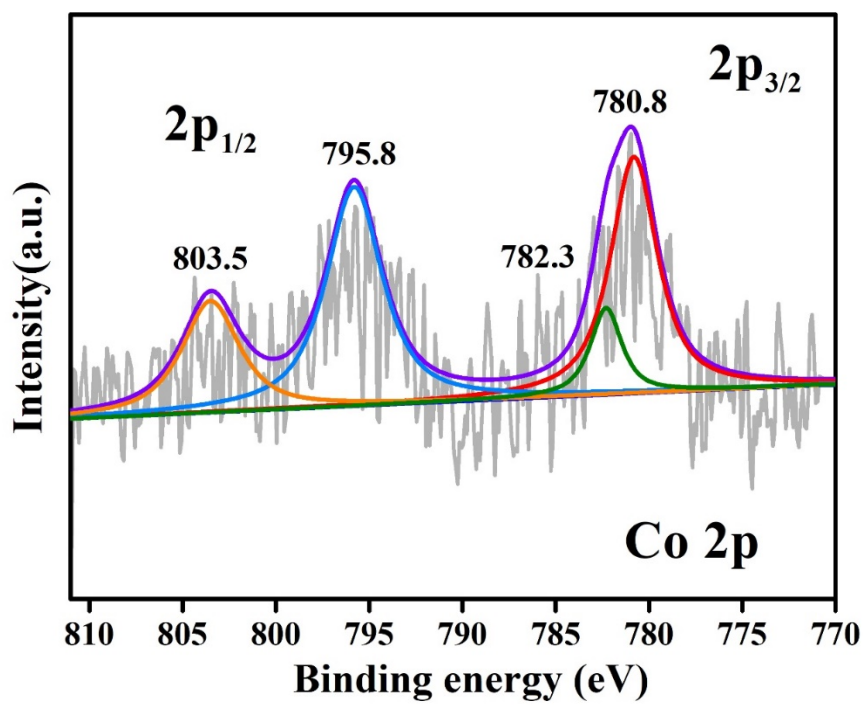

Fig. S6. X-ray photoelectron spectroscopy of Co 2p in Co-C<sub>3</sub>N<sub>4</sub>.



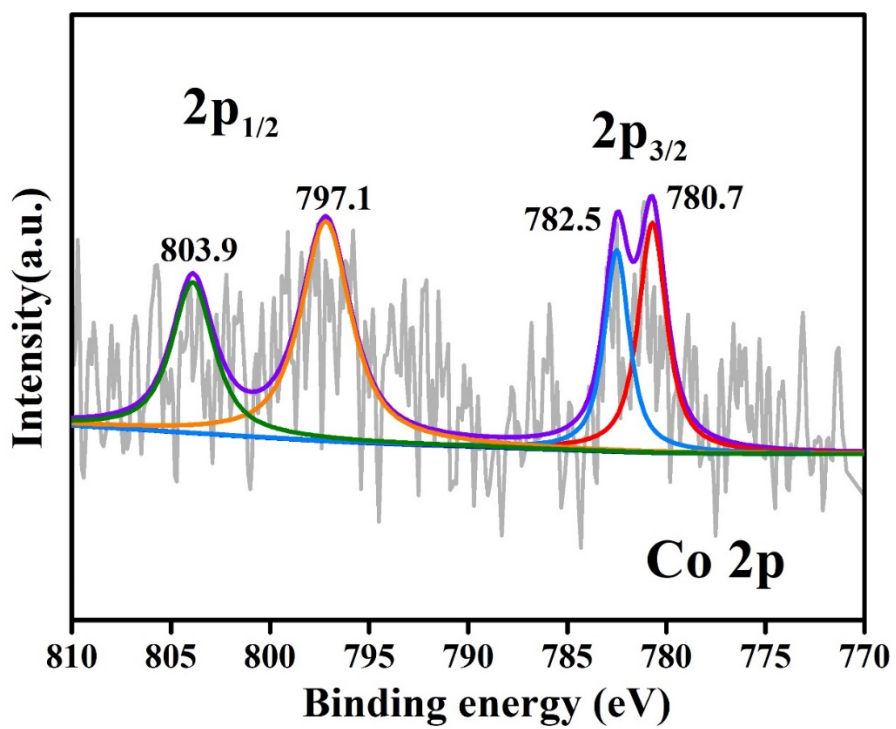

Fig. S7. X-ray photoelectron spectroscopy of Co 2p in CdS(111)/Co-C<sub>3</sub>N<sub>4</sub>.

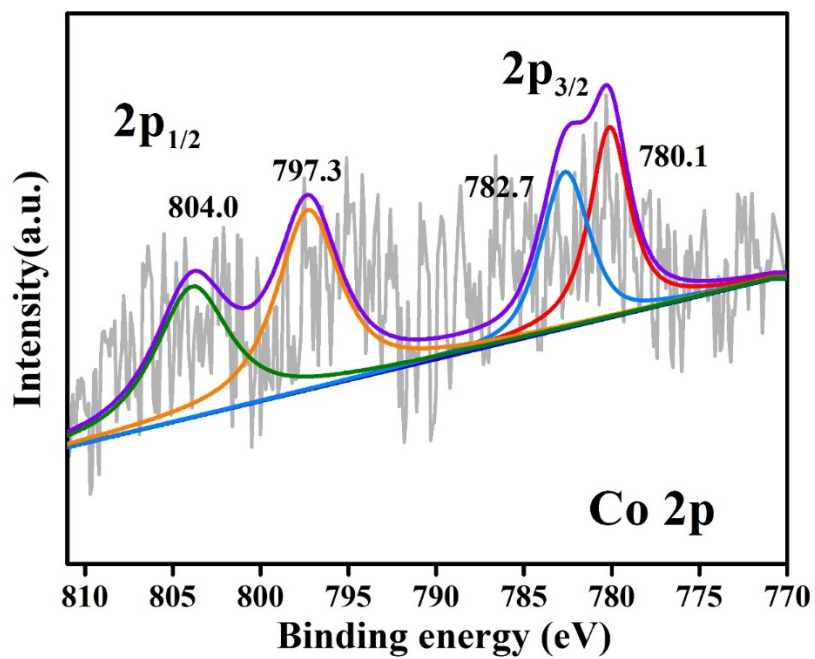

**Fig. S8.** X-ray photoelectron spectroscopy of Co 2p in CdS(002)/Co-C<sub>3</sub>N<sub>4</sub>.

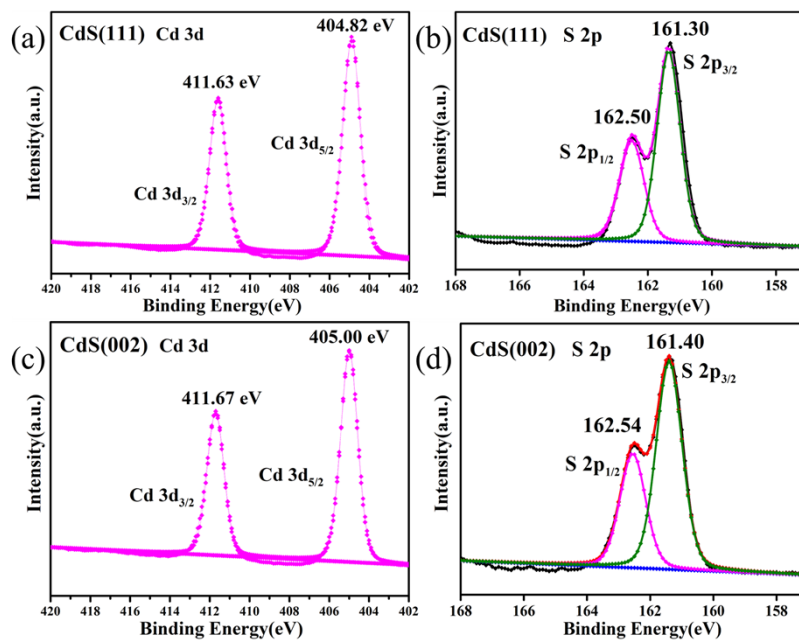

**Fig. S9.** (a, b) Cd 3d and S 2p spectra of CdS(111); (c, d) Cd 3d and S 2p spectra of CdS(002).

**Table S2.** Summary on the hydrogen evolution activity of the reported literature.

| Photocatalyst                             | H <sub>2</sub> rate<br>( $\mu\text{mol h}^{-1} \text{g}^{-1}$ ) | Sacrificial<br>agents | Incident light<br>$\lambda$ (nm) | Amount<br>(mg) | Pt (%) | Ref.             |
|-------------------------------------------|-----------------------------------------------------------------|-----------------------|----------------------------------|----------------|--------|------------------|
| 1wt%C-ZIF/g-C <sub>3</sub> N <sub>4</sub> | 326                                                             | TEOA                  | > 400                            | 100            | -      | [1]              |
| g-C <sub>3</sub> N <sub>4</sub> /CoP-4%   | 936                                                             | TEOA                  | -                                | 10             | -      | [2]              |
| Pt/g-C <sub>3</sub> N <sub>4</sub>        | 665                                                             | TEOA                  | -                                | 10             | 4      | [2]              |
| (Pt/MoP)/g-C <sub>3</sub> N <sub>4</sub>  | 531                                                             | TEOA                  | > 420                            | 50             | 1      | [3]              |
| 3.0%Pt/g-C <sub>3</sub> N <sub>4</sub>    | 287                                                             | TEOA                  | > 420                            | 50             | 3      | [3]              |
| g-C <sub>3</sub> N <sub>4</sub>           | 803                                                             | TEOA                  | > 420                            | 50             | 3      | [4]              |
| 10%SiO <sub>2</sub> -CN                   | 248                                                             | TEOA                  | > 420                            | 50             | 3      | [5]              |
| CN-2                                      | 925                                                             | lactic acid           | > 420                            | 20             | 1      | [6]              |
| CNsF-6%                                   | 54                                                              | -                     | > 420                            | 100            | -      | [7]              |
| BCN@Pt                                    | 893                                                             | methanol              | > 420                            | 30             | 0.5    | [8]              |
| Ni(OH) <sub>2</sub> /2D-CN                | 921                                                             | TEOA                  | > 400                            | 10             | -      | [9]              |
| NiL/CN                                    | 468                                                             | TEOA                  | > 420                            | 50             | -      | [10]             |
| CdS(002)/Co-C <sub>3</sub> N <sub>4</sub> | 991                                                             | TEOA                  | > 420                            | 50             | -      | <b>This work</b> |
| CdS(002)/Co-C <sub>3</sub> N <sub>4</sub> | 2337                                                            | lactic acid           | > 420                            | 50             | -      | <b>This work</b> |

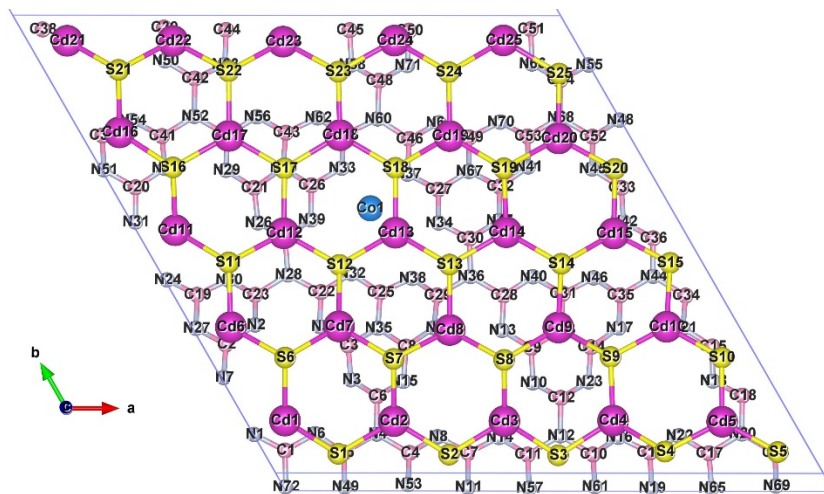

Fig. S10. Bader charge calculation model of CdS(002)/Co-C<sub>3</sub>N<sub>4</sub>.

**Table S3.** Bader charge analysis data for CdS(002)/Co-C<sub>3</sub>N<sub>4</sub>.

| #  | X        | Y        | Z        | CHARGE   | MIN DIST | ATOMIC VOL |
|----|----------|----------|----------|----------|----------|------------|
| 1  | 0.069018 | 2.520616 | 5.247396 | 11.15719 | 1.043205 | 45.612622  |
| 2  | 4.249752 | 2.516327 | 4.930201 | 11.15307 | 1.076708 | 40.02962   |
| 3  | 8.50197  | 2.520963 | 4.890398 | 11.15833 | 1.049745 | 44.739533  |
| 4  | 12.67762 | 2.554897 | 4.632355 | 11.12759 | 1.05424  | 34.612754  |
| 5  | 16.8866  | 2.49424  | 5.366785 | 11.1817  | 1.065255 | 57.631383  |
| 6  | -2.01943 | 6.108665 | 5.352237 | 11.15897 | 1.046607 | 42.131305  |
| 7  | 2.143424 | 6.141375 | 5.271211 | 11.18201 | 1.063055 | 51.226411  |
| 8  | 6.397212 | 6.016028 | 5.053744 | 11.11593 | 1.055611 | 26.537703  |
| 9  | 10.57495 | 6.110162 | 5.21828  | 11.18505 | 1.03613  | 54.740839  |
| 10 | 14.73405 | 6.16171  | 4.6473   | 11.14775 | 1.050743 | 47.925754  |
| 11 | -4.16829 | 9.836298 | 5.027466 | 11.14294 | 1.063059 | 39.754274  |
| 12 | 0.001307 | 9.724148 | 5.06681  | 11.15635 | 1.063822 | 49.434344  |
| 13 | 4.297387 | 9.753025 | 4.951992 | 11.1826  | 1.063547 | 54.630468  |
| 14 | 8.567173 | 9.765237 | 5.28649  | 11.15932 | 1.056251 | 30.676595  |
| 15 | 12.69999 | 9.733658 | 4.888854 | 11.15556 | 1.05718  | 43.796156  |
| 16 | -6.31615 | 13.58304 | 5.309679 | 11.13884 | 1.076279 | 44.406098  |
| 17 | -2.09825 | 13.44716 | 5.498489 | 11.16047 | 1.051894 | 69.467742  |
| 18 | 2.162046 | 13.49068 | 5.141094 | 11.1733  | 1.070595 | 54.419022  |
| 19 | 6.385303 | 13.4537  | 5.39897  | 11.1807  | 1.058156 | 55.439077  |
| 20 | 10.57318 | 13.37482 | 5.153096 | 11.15172 | 1.050917 | 45.714279  |
| 21 | -8.33873 | 17.10374 | 5.136565 | 11.17947 | 1.035959 | 39.618344  |
| 22 | -4.27619 | 17.09711 | 5.296696 | 11.15581 | 1.068394 | 43.600394  |
| 23 | -0.03499 | 17.08267 | 5.026193 | 11.13763 | 1.047529 | 38.392071  |
| 24 | 4.257329 | 17.11708 | 5.365909 | 11.15877 | 1.061597 | 39.962816  |
| 25 | 8.441952 | 17.13274 | 5.235395 | 11.1316  | 1.103449 | 37.351684  |
| 26 | 2.105664 | 1.274154 | 4.50994  | 6.841972 | 1.127949 | 44.82144   |
| 27 | 6.371382 | 1.243031 | 4.58318  | 6.853033 | 1.16279  | 47.596966  |
| 28 | 10.56215 | 1.228629 | 4.384915 | 6.84324  | 1.123457 | 45.868797  |
| 29 | 14.68918 | 1.340578 | 5.497257 | 6.816865 | 1.119031 | 143.645979 |
| 30 | 19.03065 | 1.317853 | 5.790032 | 6.828712 | 1.143866 | 151.169758 |
| 31 | 0.080431 | 4.920467 | 5.917832 | 6.809988 | 1.111755 | 178.410928 |
| 32 | 4.247381 | 4.87978  | 5.687341 | 6.820831 | 1.126083 | 161.902994 |
| 33 | 8.504931 | 4.845682 | 5.734741 | 6.807242 | 1.127604 | 181.092349 |
| 34 | 12.56921 | 5.014291 | 4.209651 | 6.820119 | 1.113513 | 44.50427   |
| 35 | 16.86259 | 4.967306 | 5.100059 | 6.864019 | 1.116349 | 85.777009  |
| 36 | -2.10252 | 8.579741 | 5.66173  | 6.821264 | 1.129609 | 156.727782 |
| 37 | 2.140747 | 8.529489 | 4.52455  | 6.855913 | 1.141686 | 48.269645  |
| 38 | 6.391384 | 8.516091 | 5.408885 | 6.829129 | 1.125529 | 121.570727 |
| 39 | 10.69434 | 8.540952 | 5.725328 | 6.81585  | 1.124098 | 182.157714 |
| 40 | 14.85426 | 8.627766 | 4.283289 | 6.83541  | 1.116661 | 44.1354    |

|    |          |          |          |          |          |            |
|----|----------|----------|----------|----------|----------|------------|
| 41 | -4.24782 | 12.22618 | 5.715205 | 6.825338 | 1.161064 | 142.855378 |
| 42 | 0.035347 | 12.21561 | 5.061759 | 6.845432 | 1.148396 | 68.573742  |
| 43 | 4.288619 | 12.2496  | 4.785181 | 6.838832 | 1.146462 | 55.117841  |
| 44 | 8.484265 | 12.20251 | 5.826767 | 6.820158 | 1.108419 | 175.920041 |
| 45 | 12.73287 | 12.22085 | 4.706264 | 6.851125 | 1.11986  | 50.967912  |
| 46 | -6.34691 | 15.95781 | 6.068738 | 6.78785  | 1.103391 | 214.672849 |
| 47 | -2.11359 | 15.92483 | 5.734073 | 6.838868 | 1.136817 | 158.00227  |
| 48 | 2.100395 | 15.91402 | 5.558517 | 6.841335 | 1.123144 | 140.630542 |
| 49 | 6.358535 | 15.89369 | 5.792015 | 6.825251 | 1.135377 | 148.786338 |
| 50 | 10.5867  | 15.86675 | 5.141533 | 6.811023 | 1.159158 | 70.554601  |
| 51 | 0.007746 | 1.498161 | 1.449073 | 2.529147 | 0.400529 | 14.129741  |
| 52 | -2.26955 | 5.555363 | 1.874031 | 2.580964 | 0.360232 | 8.506076   |
| 53 | 2.417399 | 5.552643 | 1.004829 | 2.48358  | 0.334469 | 14.896525  |
| 54 | 4.782884 | 1.414761 | 1.264626 | 2.522123 | 0.40166  | 7.522037   |
| 55 | 2.264661 | 1.4294   | 1.144235 | 2.570756 | 0.370355 | 12.343483  |
| 56 | 3.536851 | 3.59117  | 1.329058 | 2.517916 | 0.342166 | 7.581869   |
| 57 | 7.04354  | 1.437906 | 0.914161 | 2.502341 | 0.364762 | 18.049635  |
| 58 | 4.661931 | 5.476233 | 1.993462 | 2.495216 | 0.352649 | 7.605686   |
| 59 | 9.471667 | 5.436368 | 1.675265 | 2.577028 | 0.389418 | 12.177346  |
| 60 | 11.84512 | 1.369711 | 1.126452 | 2.519105 | 0.391273 | 6.995163   |
| 61 | 9.333009 | 1.365732 | 1.011342 | 2.505897 | 0.392964 | 10.186612  |
| 62 | 10.60465 | 3.541009 | 1.09794  | 2.464236 | 0.336267 | 7.307686   |
| 63 | 14.04657 | 1.423449 | 1.77422  | 2.495906 | 0.392322 | 10.070432  |
| 64 | 11.74905 | 5.502792 | 0.783584 | 2.451292 | 0.36202  | 16.82278   |
| 65 | 16.43215 | 5.511956 | 1.452893 | 2.289265 | 0.371402 | 8.27546    |
| 66 | 18.8619  | 1.414377 | 1.956268 | 2.52258  | 0.390278 | 8.026836   |
| 67 | 16.32415 | 1.38906  | 1.968395 | 2.581952 | 0.36369  | 11.290897  |
| 68 | 17.6001  | 3.6082   | 1.927339 | 2.460347 | 0.338386 | 7.372165   |
| 69 | -3.3994  | 7.492267 | 0.852483 | 2.525526 | 0.383554 | 18.578832  |
| 70 | -5.76421 | 11.60062 | 1.344733 | 2.421355 | 0.39019  | 11.663833  |
| 71 | -1.18788 | 11.56608 | 1.936001 | 2.493141 | 0.34455  | 7.552243   |
| 72 | 1.363803 | 7.596531 | 1.092555 | 2.574241 | 0.427736 | 8.388154   |
| 73 | -1.15666 | 7.47728  | 1.308854 | 2.554733 | 0.339747 | 7.389592   |
| 74 | -0.01247 | 9.690726 | 1.308457 | 2.511486 | 0.361328 | 7.110761   |
| 75 | 3.652492 | 7.578862 | 1.332085 | 2.405317 | 0.363512 | 12.281908  |
| 76 | 0.992198 | 11.70119 | 0.939291 | 2.498712 | 0.322622 | 24.438341  |
| 77 | 5.887698 | 11.51362 | 1.761134 | 2.37188  | 0.35166  | 9.208962   |
| 78 | 8.411527 | 7.443986 | 1.982233 | 2.515825 | 0.445015 | 11.510476  |
| 79 | 5.856904 | 7.445264 | 1.933559 | 2.605693 | 0.345343 | 8.123265   |
| 80 | 7.103442 | 9.621308 | 2.187615 | 2.591722 | 0.366742 | 8.259195   |
| 81 | 10.67866 | 7.525853 | 1.630348 | 2.434367 | 0.331651 | 13.752739  |
| 82 | 8.257883 | 11.61841 | 2.127649 | 2.492003 | 0.352576 | 8.754119   |
| 83 | 12.91837 | 11.6206  | 0.980263 | 2.55568  | 0.366258 | 20.934951  |

|     |          |          |          |          |          |            |
|-----|----------|----------|----------|----------|----------|------------|
| 84  | 15.38955 | 7.480548 | 0.943549 | 2.566355 | 0.412579 | 9.068966   |
| 85  | 12.87434 | 7.489273 | 1.000279 | 2.52805  | 0.335688 | 7.590002   |
| 86  | 14.14142 | 9.681471 | 0.928041 | 2.593051 | 0.365632 | 12.223818  |
| 87  | -7.03272 | 13.57147 | 1.939779 | 2.481279 | 0.359041 | 7.920532   |
| 88  | -9.35632 | 17.67069 | 1.086064 | 2.483528 | 0.355044 | 19.134751  |
| 89  | -4.67245 | 17.72365 | 1.772238 | 2.505692 | 0.403977 | 8.971956   |
| 90  | -2.23216 | 13.58197 | 2.200723 | 2.631578 | 0.418847 | 7.929245   |
| 91  | -4.74194 | 13.55048 | 1.961987 | 2.518521 | 0.323826 | 8.590306   |
| 92  | -3.48489 | 15.76409 | 1.926462 | 2.509501 | 0.365486 | 9.019008   |
| 93  | 0.02621  | 13.68957 | 1.893067 | 2.444765 | 0.34288  | 8.063433   |
| 94  | -2.28747 | 17.64576 | 1.399982 | 2.425477 | 0.378904 | 16.893069  |
| 95  | 2.449689 | 17.66377 | 0.862084 | 2.453204 | 0.340228 | 18.978489  |
| 96  | 4.756252 | 13.47286 | 1.199484 | 2.560312 | 0.407241 | 10.759957  |
| 97  | 2.24507  | 13.62393 | 1.280113 | 2.6223   | 0.363292 | 7.705019   |
| 98  | 3.59102  | 15.71227 | 1.197167 | 2.503197 | 0.350308 | 7.954224   |
| 99  | 7.066567 | 13.53861 | 1.15129  | 2.459095 | 0.356544 | 22.603868  |
| 100 | 4.753375 | 17.62192 | 1.643498 | 2.426856 | 0.372065 | 13.153834  |
| 101 | 9.438354 | 17.67047 | 1.968729 | 2.523485 | 0.35074  | 8.129655   |
| 102 | 11.81303 | 13.56289 | 1.475873 | 2.557035 | 0.413812 | 7.178726   |
| 103 | 9.313945 | 13.5676  | 1.556482 | 2.500277 | 0.333254 | 7.249015   |
| 104 | 10.56306 | 15.73799 | 1.500669 | 2.485335 | 0.327748 | 7.16827    |
| 105 | -1.18497 | 2.110842 | 1.480528 | 6.160534 | 0.712648 | 79.40573   |
| 106 | -1.14203 | 6.300783 | 1.953701 | 6.136948 | 0.733151 | 19.672661  |
| 107 | 2.519076 | 4.24054  | 0.763171 | 6.121447 | 0.684046 | 112.141605 |
| 108 | 3.525775 | 2.143315 | 1.215367 | 6.098514 | 0.756507 | 20.918105  |
| 109 | 1.320267 | 6.280832 | 0.807942 | 6.146195 | 0.704535 | 84.407835  |
| 110 | 1.160901 | 2.148591 | 1.379485 | 6.100629 | 0.677719 | 23.117381  |
| 111 | -2.3446  | 4.272228 | 2.253008 | 6.088077 | 0.691826 | 17.412972  |
| 112 | 5.855375 | 2.053727 | 0.771937 | 6.11431  | 0.672522 | 105.316064 |
| 113 | 5.746268 | 6.185147 | 2.415686 | 6.097099 | 0.704516 | 16.125704  |
| 114 | 9.538967 | 4.100645 | 1.688519 | 6.08011  | 0.678008 | 18.822809  |
| 115 | 7.044626 | 0.09658  | 1.337678 | 6.21716  | 0.753421 | 28.656816  |
| 116 | 10.59029 | 2.090234 | 1.021235 | 6.119128 | 0.773417 | 22.383708  |
| 117 | 8.349064 | 6.105324 | 1.975408 | 6.172809 | 0.660943 | 25.632085  |
| 118 | 8.219364 | 2.035857 | 0.658434 | 6.116237 | 0.670612 | 119.718246 |
| 119 | 4.5639   | 4.142628 | 2.034893 | 6.127822 | 0.72147  | 18.255853  |
| 120 | 12.83451 | 2.008951 | 1.78593  | 6.122315 | 0.690746 | 16.552082  |
| 121 | 12.82425 | 6.251189 | 0.477347 | 6.124272 | 0.737446 | 137.931113 |
| 122 | 16.45797 | 4.181672 | 1.557567 | 6.224595 | 0.671464 | 59.622698  |
| 123 | 14.10716 | 0.072302 | 1.402007 | 6.176556 | 0.748681 | 25.004135  |
| 124 | 17.58705 | 2.138442 | 2.019573 | 6.049096 | 0.74596  | 17.932875  |
| 125 | 15.30172 | 6.225177 | 1.406202 | 6.189446 | 0.737141 | 19.046454  |
| 126 | 15.16831 | 2.056812 | 2.131511 | 6.112361 | 0.671966 | 17.859101  |



|     |          |          |          |          |          |            |
|-----|----------|----------|----------|----------|----------|------------|
| 127 | 11.66001 | 4.178989 | 0.557643 | 6.185663 | 0.769507 | 105.176649 |
| 128 | -4.55892 | 8.075669 | 0.513999 | 6.057778 | 0.685168 | 130.897611 |
| 129 | -4.64083 | 12.33165 | 1.430664 | 6.115649 | 0.74195  | 77.023471  |
| 130 | -1.04246 | 10.22406 | 1.985468 | 6.127679 | 0.633485 | 18.142578  |
| 131 | -3.42824 | 6.189163 | 1.383368 | 6.248698 | 0.715973 | 24.052045  |
| 132 | 0.098874 | 8.250428 | 1.249264 | 6.067735 | 0.752371 | 17.591888  |
| 133 | -2.26945 | 12.23128 | 2.305376 | 6.090202 | 0.664884 | 16.990659  |
| 134 | -2.19555 | 8.073186 | 0.702308 | 6.105084 | 0.664697 | 102.882686 |
| 135 | -5.77036 | 10.27548 | 1.218498 | 6.167531 | 0.74908  | 22.601545  |
| 136 | 2.539626 | 8.303528 | 1.184414 | 6.171669 | 0.736832 | 32.810811  |
| 137 | 2.151781 | 12.36706 | 0.738625 | 6.148161 | 0.738396 | 93.169506  |
| 138 | 5.906646 | 10.22397 | 2.0652   | 6.177197 | 0.681558 | 16.384784  |
| 139 | 3.570269 | 6.20174  | 1.494178 | 6.160326 | 0.735502 | 14.853539  |
| 140 | 7.137746 | 8.168817 | 2.074258 | 5.978782 | 0.761109 | 17.210239  |
| 141 | 4.698679 | 12.11792 | 1.490588 | 6.155755 | 0.701182 | 18.902973  |
| 142 | 4.877089 | 8.120226 | 1.327848 | 6.205377 | 0.664536 | 96.376058  |
| 143 | 0.979941 | 10.38283 | 0.710907 | 6.179157 | 0.725121 | 101.200989 |
| 144 | 9.536217 | 8.166499 | 1.908283 | 6.106152 | 0.66987  | 28.186289  |
| 145 | 9.351874 | 12.37511 | 2.202121 | 6.180307 | 0.736263 | 17.928808  |
| 146 | 12.98823 | 10.32082 | 0.649439 | 6.055934 | 0.683148 | 117.206447 |
| 147 | 10.63072 | 6.154992 | 1.344044 | 6.173728 | 0.715949 | 25.736065  |
| 148 | 14.13918 | 8.224691 | 0.890283 | 5.98099  | 0.766396 | 24.933266  |
| 149 | 11.78586 | 12.34326 | 0.917709 | 6.10693  | 0.68158  | 96.827996  |
| 150 | 11.87195 | 8.135686 | 1.613066 | 6.182813 | 0.68246  | 19.326447  |
| 151 | 8.236742 | 10.30317 | 2.428668 | 6.11811  | 0.725497 | 17.323513  |
| 152 | 12.86367 | 14.18231 | 2.038776 | 6.12556  | 0.667548 | 18.490536  |
| 153 | 2.292894 | 0.123631 | 0.819171 | 6.115377 | 0.726937 | 119.230874 |
| 154 | -4.6249  | 16.43827 | 2.169102 | 6.104924 | 0.667261 | 21.422323  |
| 155 | -6.98718 | 12.27563 | 1.403134 | 6.224045 | 0.780863 | 28.217658  |
| 156 | -3.48994 | 14.3053  | 2.102018 | 6.046655 | 0.744369 | 17.089993  |
| 157 | 4.740919 | 0.191808 | 1.809787 | 6.104653 | 0.705921 | 18.947121  |
| 158 | -5.8838  | 14.13494 | 2.370331 | 6.146119 | 0.672739 | 18.147806  |
| 159 | 11.64594 | 16.33395 | 0.977737 | 6.130488 | 0.758046 | 90.436385  |
| 160 | -1.08966 | 14.28929 | 2.276531 | 6.140925 | 0.662917 | 17.149244  |
| 161 | 9.395061 | 0.070203 | 1.34538  | 6.146988 | 0.768654 | 21.273614  |
| 162 | 2.523998 | 16.33851 | 0.663026 | 6.173463 | 0.682802 | 111.729168 |
| 163 | -0.09987 | 12.34346 | 1.430956 | 6.215422 | 0.727035 | 44.270749  |
| 164 | 3.539359 | 14.24694 | 1.211652 | 6.12439  | 0.787986 | 19.500716  |
| 165 | 11.90788 | 0.152582 | 0.571335 | 6.123303 | 0.652067 | 134.938912 |
| 166 | 1.244104 | 14.26167 | 1.888663 | 6.18356  | 0.65652  | 18.941312  |
| 167 | -2.33715 | 16.31296 | 1.529891 | 6.173891 | 0.760294 | 54.29471   |
| 168 | 5.890143 | 14.1092  | 0.900406 | 6.127546 | 0.663177 | 101.616912 |
| 169 | 16.41775 | 0.063942 | 1.804965 | 6.126169 | 0.77395  | 39.426067  |

|     |          |          |          |          |          |           |
|-----|----------|----------|----------|----------|----------|-----------|
| 170 | 9.486211 | 16.33659 | 2.040508 | 6.105387 | 0.637186 | 18.658415 |
| 171 | 7.066104 | 12.2195  | 1.666979 | 6.268142 | 0.721579 | 27.635599 |
| 172 | 10.56126 | 14.29238 | 1.501776 | 6.062463 | 0.738292 | 16.399887 |
| 173 | 18.90791 | 0.132649 | 2.366052 | 6.134868 | 0.645552 | 16.95232  |
| 174 | 8.254226 | 14.13808 | 0.975337 | 6.192697 | 0.675148 | 103.20218 |
| 175 | 4.690364 | 16.28322 | 1.69691  | 6.179957 | 0.731684 | 21.242245 |
| 176 | 0.028096 | 0.103863 | 1.500607 | 6.152361 | 0.722922 | 17.648235 |
| 177 | 3.267671 | 10.81228 | 1.189214 | 8.145887 | 0.840612 | 64.807205 |

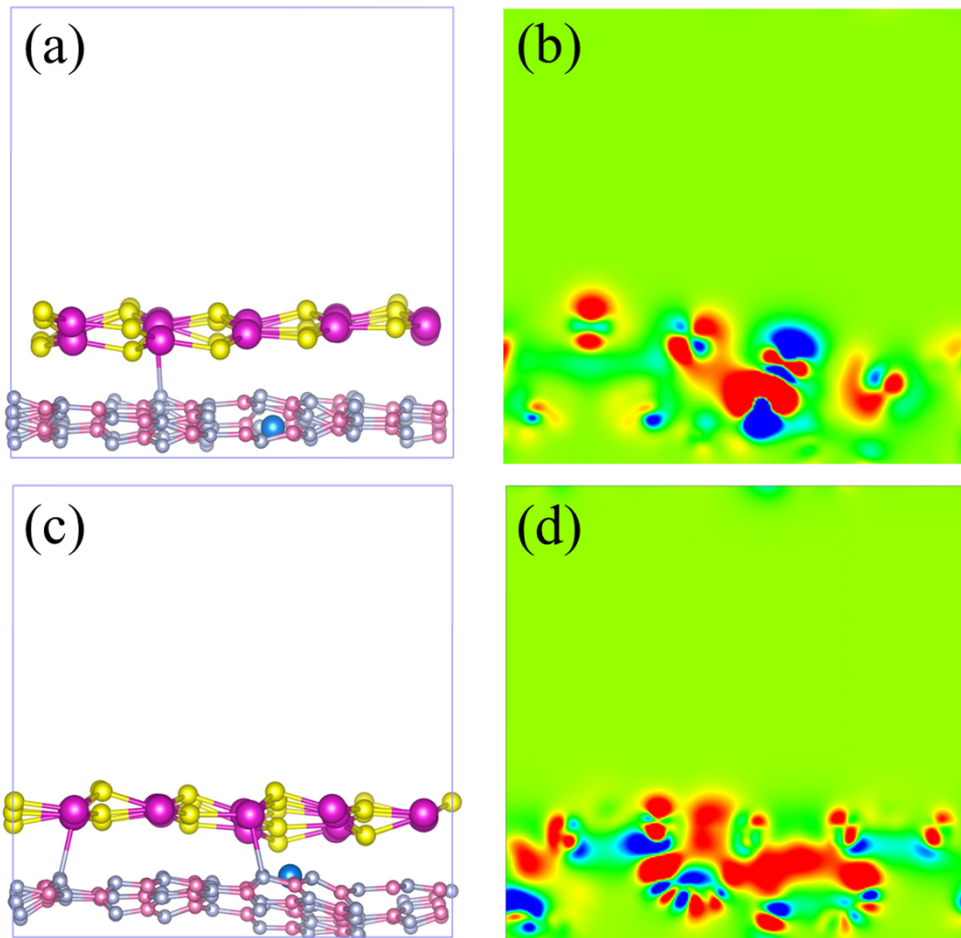

**Fig. S11.** (a) side view of the optimized model of CdS(111)/Co-C<sub>3</sub>N<sub>4</sub>; (b) 2D charge density distribution image of CdS(111)/Co-C<sub>3</sub>N<sub>4</sub>; (c) side view of the optimized model of CdS(002)/Co-C<sub>3</sub>N<sub>4</sub>; (d) 2D charge density distribution image of CdS(002)/Co-C<sub>3</sub>N<sub>4</sub>. C, N, Co, Cd, S atoms are shown in pink, light purple, dark blue, rosy red and yellow, respectively. Red represents electron-rich regions and blue represents electron-deficient regions.

## References

1. F. He, G. Chen, Y. Zhou, Y. Yu, L. Li, S. Hao, B. Liu, *J. Mater. Chem. A* 2016, **4**, 3822-3827.
2. K. Qi, W. Lv, I. Khan, S.-y. Liu, *Chinese J. Catal.* 2020, **41**, 114-121.
3. J. Zhang, Y. Dang, W. Wang, H. Zhan, X. Song, B. Ma, *Int. J. Hydrogen Energ.* 2022, **47**, 2338-2346.
4. Y. Yu, W. Yan, W. Gao, P. Li, X. Wang, S. Wu, W. Song, K. Ding, *J. Mater. Chem. A* 2017, **5**, 17199-17203.
5. M. You, S. Yi, D. Xia, H. Jing, H. Ji, L. Zhang, Y. Wang, Z. Zhang, D. Chen, *Catal. Sci. & Technol.* 2020, **10**, 4655-4662.
6. Q. Xiang, F. Li, D. Zhang, Y. Liao, H. Zhou, *Appl. Surf. Sci.* 2019, **495**, 143520.
7. A. Beyhaqi, S.M.T. Azimi, Z. Chen, C. Hu, Q. Zeng, *Int. J. Hydrogen Energ.* 2021, **46**, 20547-20559.
8. K. Huang, C. Li, J. Yang, R. Zheng, W. Wang, L. Wang, *Appl. Surf. Sci.* 2022, **581**, 152298.
9. Q. Hao, Y. Song, Z. Mo, J. Deng, J. Yi, W. El-Alami, H. Xu, H. Li, *Solar RRL* 2020, **4**, 1900538.
10. W.C. Zhou, W.D. Zhang, *J. Colloid Interf. Sci.* 2022, **616**, 791-802.
